# Supplementary material for: Understanding the Role of Physiological and Agronomical Traits during Drought Recovery as a Determinant of Differential Drought Stress Tolerance in Barley
Source: MDPI journal article supplement (doi:10.3390/agronomy12092136), 2022-09-08
Supplement: s1 [file s1]

## Supplementary Materials

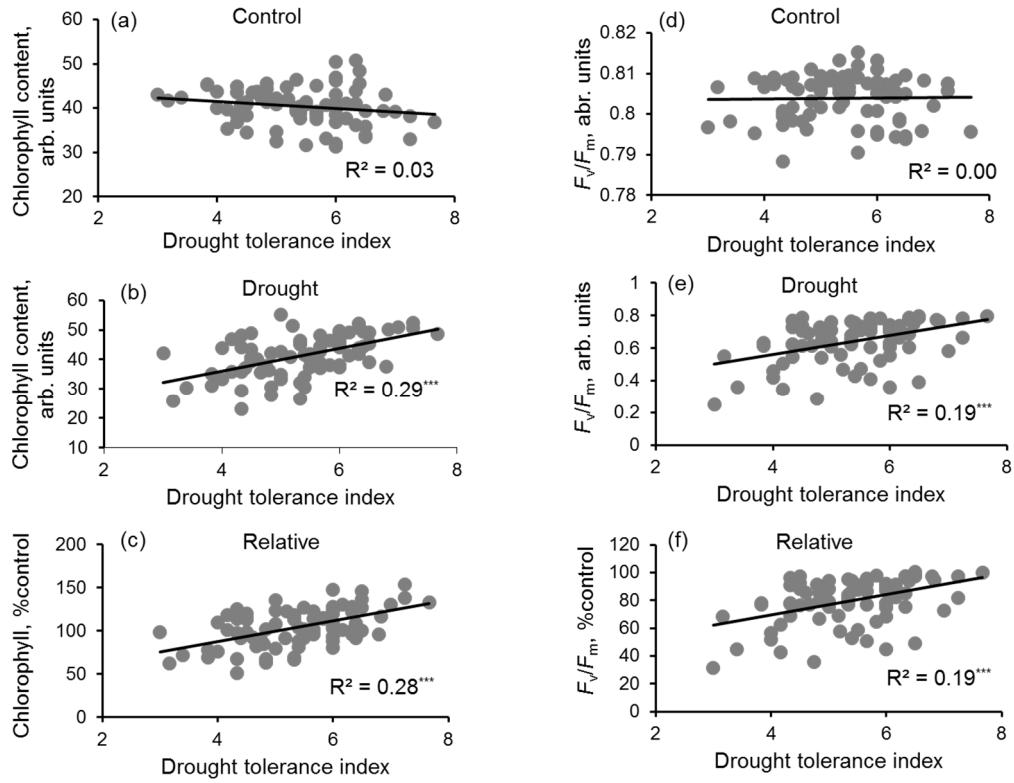

**Figure S1.** Correlations (Pearson's  $R^2$  value) of chlorophyll content and  $F_v/F_m$  with drought tolerance index (a) correlation between chlorophyll content under irrigated conditions and the drought tolerance index; (b) correlation between chlorophyll content under drought stress conditions and the drought tolerance index; (c) correlation between chlorophyll content (% control) under drought stress conditions and the drought tolerance index; (d) correlation between  $F_v/F_m$  ratio under irrigated conditions and the drought tolerance index; (e) correlation between  $F_v/F_m$  ratio under drought stress conditions and the drought tolerance index; (f) correlation between  $F_v/F_m$  ratio (% control) under drought stress conditions and the drought tolerance index.  $^{***}P < 0.001$  indicates significant difference by two-tailed test.

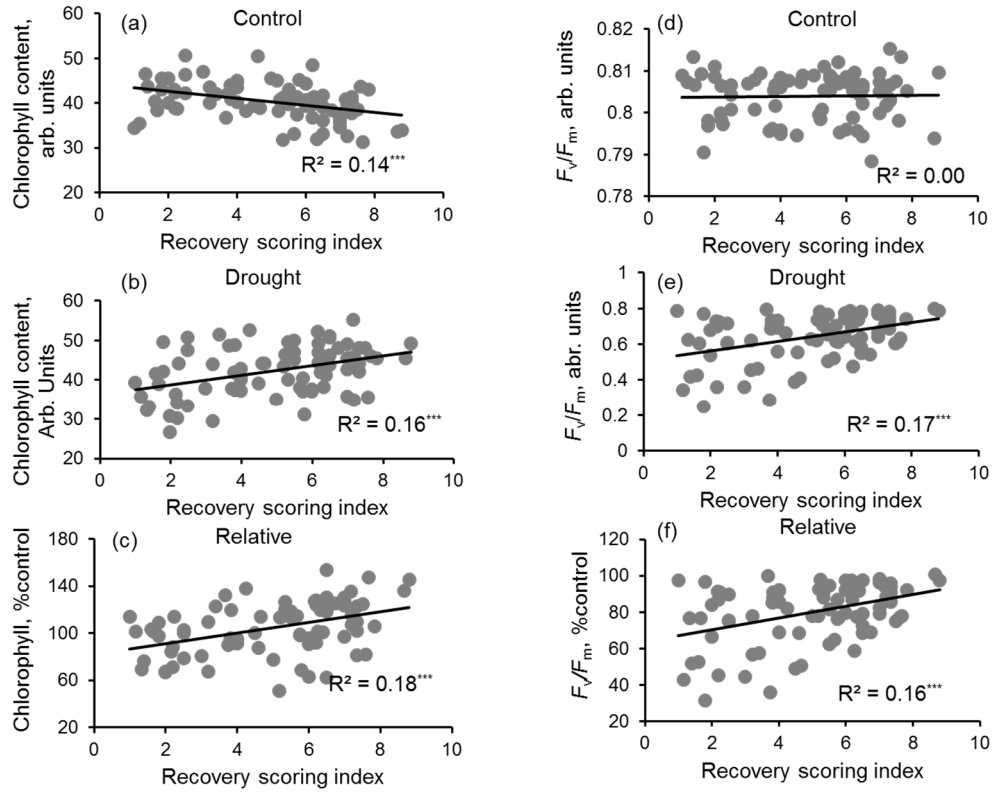

**Figure S2.** Correlations (Pearson's  $R^2$  value) of chlorophyll content and  $F_v/F_m$  with drought recovery index (a) correlation between chlorophyll content under irrigated conditions and the drought recovery index; (b) correlation between chlorophyll content under drought stress conditions and the drought recovery index; (c) correlation between chlorophyll content (% control) under drought stress conditions and the drought recovery index; (d) correlation between  $F_v/F_m$  ratio under irrigated conditions and the drought recovery index; (e) correlation between  $F_v/F_m$  ratio under drought stress conditions and the drought recovery index; (f) correlation between  $F_v/F_m$  ratio (% control) under drought stress conditions and the drought recovery index. \*\*\* $P < 0.001$  indicates significant difference by two-tailed test.

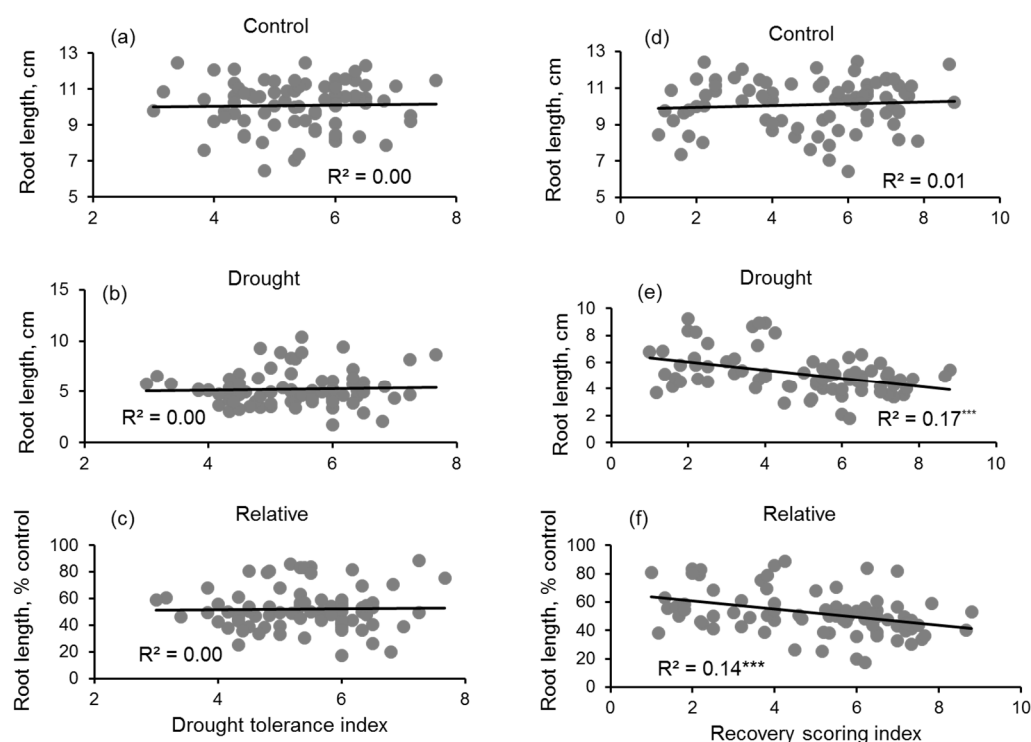

**Figure S3.** Correlations (Pearson's  $R^2$  value) between the root length and both drought tolerance index and drought recovery index (a) correlation between root length under control conditions and the drought tolerance index; (b) correlation between root lengths under PEG induced drought stress conditions and the drought tolerance index; (c) correlation between root lengths (% control) under PEG induced drought stress conditions and the drought tolerance index; (d) correlation between root length under irrigated conditions and the drought recovery index; (e) correlation between root length under PEG-induced drought stress conditions and the drought recovery index; (f) correlation between the root lengths (% control) under PEG induced drought stress conditions and the drought recovery index. \*\*\* $P < 0.001$  indicates significant difference by two-tailed test.

**Table S1.** Origin of the different barley genotypes.

| Genotypes          | Origin      |
|--------------------|-------------|
| 93-3143 C60        | China       |
| AC Burman          | Canada      |
| Aizao3             | China       |
| Barque73           | Australia   |
| Boa Fe             | Portugal    |
| Brindabella        | Australia   |
| Carmen             | Australia   |
| Cevada de 2 ordens | Portugal    |
| cevada Preta       | Portugal    |
| CI-4196            | China       |
| CI-8826            | China       |
| Clipper            | Australia   |
| CM72               | America     |
| CPI71284-48        | Unknown     |
| CXHKSL             | China       |
| DASH               | New Zealand |
| Dayton             | America     |
| DYSYH              | China       |
| Flagship           | Australia   |

|              |           |
|--------------|-----------|
| Franklin     | Australia |
| Gairdner     | Australia |
| Gebeina      | Germany   |
| Haruna nijo  | Japan     |
| Honen        | Japan     |
| HOR12522     | Spain     |
| HOR12779     | Spain     |
| HOR13437     | Moroco    |
| HOR13447     | Moroco    |
| HOR1448      | Portugal  |
| HOR2410      | Portugal  |
| HOR3870      | Portugal  |
| HOR4055      | Spain     |
| HOR8847      | Spain     |
| HOR8851      | Spain     |
| HU93-045     | China     |
| Karin        | Unknown   |
| Keel         | Australia |
| Kinu nijo6   | Japan     |
| Lixi143      | China     |
| Macquarie    | Australia |
| Mundah       | Australia |
| Naso nijo    | Japan     |
| Numar        | America   |
| RGZLL        | China     |
| Sahara       | Japan     |
| Schooner     | Australia |
| Skiff        | Australia |
| Svanhals     | CYMMIT    |
| SYR01        | Syria     |
| TAM407227    | Unknown   |
| TF026        | Australia |
| TX9425       | China     |
| Unicorn      | Japan     |
| WA12908      | China     |
| WA12915      | China     |
| WA12916      | China     |
| WA12918      | China     |
| WA12924      | China     |
| WA12927      | China     |
| WA12930      | China     |
| WA12931      | China     |
| WA12937      | China     |
| WA12949      | China     |
| Westminister | British   |
| Xiaojiang    | China     |
| Yan89110     | China     |
| Yan90260     | China     |
| Yerong       | China     |
| YF374        | China     |
| Yiwu Erleng  | China     |
| YPSLDM       | China     |
| YSM1         | China     |
| YSM3         | China     |
| YU6472       | China     |
| YUQS         | China     |
| YWHKSL       | China     |
| YYXT         | China     |
| Zhepi 2      | China     |

ZUG293  
ZUG403

China  
China

---
