# Supplementary material for: Understanding the Role of Physiological and Agronomical Traits during Drought Recovery as a Determinant of Differential Drought Stress Tolerance in Barley
Source: MDPI journal article supplement (doi:10.3390/agronomy12092136), 2022-09-08
Supplement: s1 [file s1]

Archive with 1 entries (1 files):
- agronomy-1877199-supplementary.pdf
